# Supplementary material for: Scaling relation between genome length and particle size of viruses provides insights into viral life history
Source: iScience. 2021 Apr 21;24(5):102452. doi: 10.1016/j.isci.2021.102452 (PMC8169800; doi:10.1016/j.isci.2021.102452)
Supplement: Document S1. Figures S1–S3 and Table S2 [file mmc1.pdf]

## **Supplemental information**

**Scaling relation between genome length  
and particle size of viruses provides  
insights into viral life history**

**Harshali V. Chaudhari, Mandar M. Inamdar, and Kiran Kondabagil**

## Supplemental Information

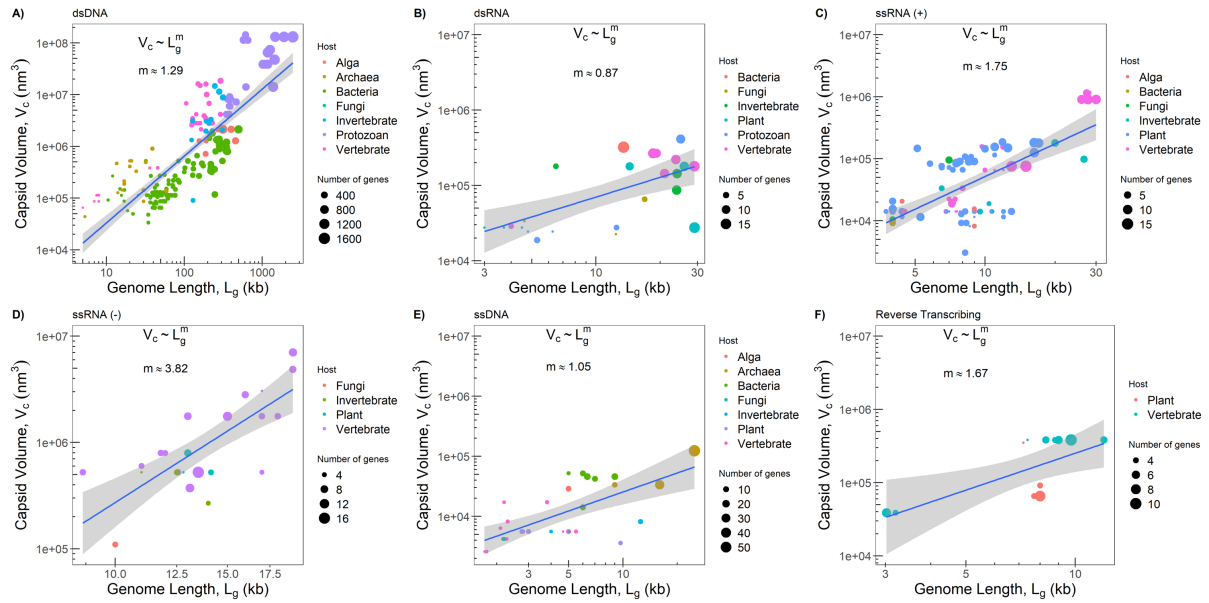

**Figure S1. The log-log plot of outer capsid volume as a function of genome length for viruses infecting different hosts according to the Baltimore classification. Related to Figure 1 and STAR Methods “Data analysis”.**

Size of the data points indicate the number of genes. A power law  $y = ax^m$  is used as a fitting expression for the entire data. A linear regression fit of the form  $Y = mX + A$  to the data, where  $Y = \log y$ ,  $X = \log x$ , and  $A = \log a$ , gives

(A)  $m = 1.29$  for dsDNA viruses

(B)  $m = 0.87$  for dsRNA viruses

(C)  $m = 1.75$  for ssRNA (+) positive sense viruses

(D)  $m = 3.82$  for ssRNA (-) negative sense viruses

(E)  $m = 1.05$  for ssDNA viruses

(F)  $m = 1.67$  for reverse transcribing viruses.

All logs are to the base 10. Data and formulas are presented in the Table S1.

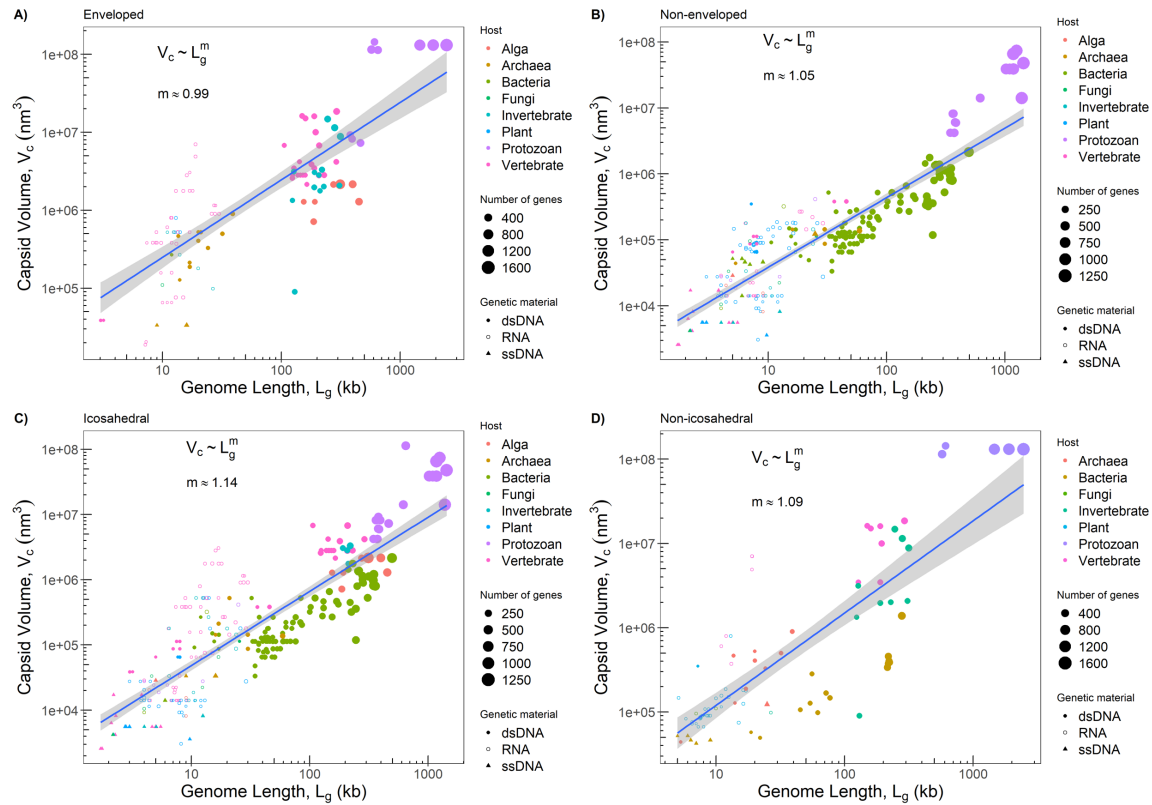

**Figure S2. The log-log plot of outer capsid volume as a function of genome length for viruses infecting different hosts according to enveloped (A), non-enveloped (B), icosahedral (C), and non-icosahedral (D) viruses. Related to Figure 1 and STAR Methods “Data analysis”.**

Size of the data points indicate the number of genes. A power law  $y = ax^m$  is used as a fitting expression for the entire data. A linear regression fit of the form  $Y = mX + A$  to the data, where  $Y = \log y$ ,  $X = \log x$ , and  $A = \log a$ , gives

(A)  $m = 0.99$  for enveloped viruses

(B)  $m = 1.05$  for non-enveloped viruses

(C)  $m = 1.14$  for icosahedral viruses

(D)  $m = 1.09$  for non-icosahedral viruses.

All logs are to the base 10. Data and formulas are presented in the Table S1.

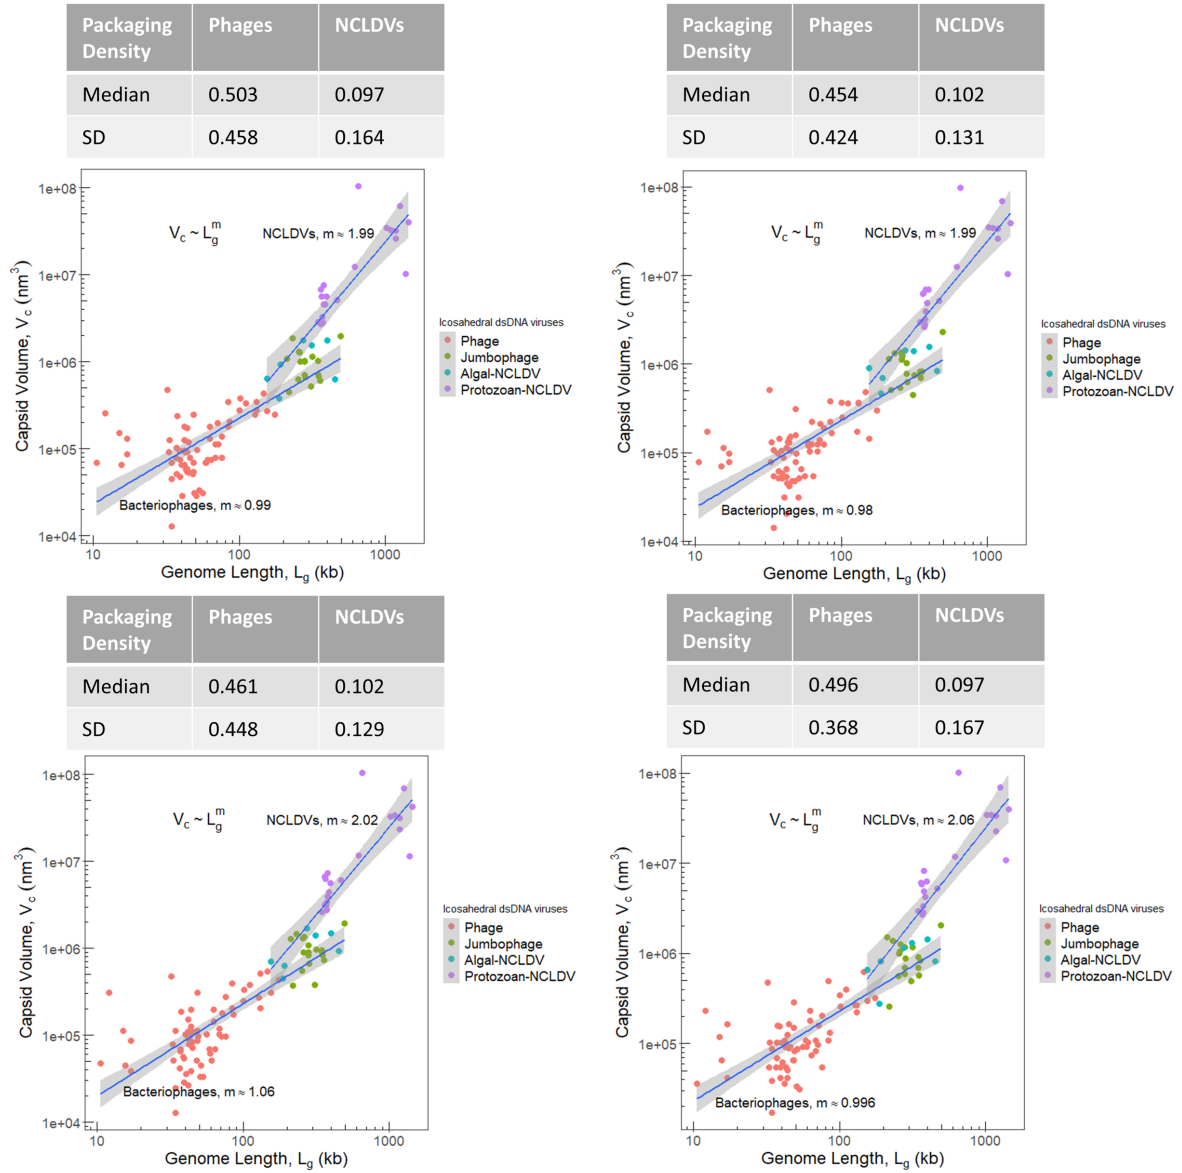

**Figure S3. The log-log plot of inner capsid volume versus genome length for icosahedral dsDNA bacteriophages (including jumbophages) and NCLDVs (algal and protozoan). Related to STAR Methods “Data collection”.**

Inner radius estimated by subtracting capsid thickness, 3 nm for bacteriophages and 10 nm for NCLDVs, from the outer radius. The influence on the scaling relations and median packaging density of error  $\Delta D$  in the capsid diameter that is randomly sampled from  $[-10 \text{ nm}, +10 \text{ nm}]$  is shown for four separate instances. A small error  $\Delta R = \Delta D/2$  in the measurement/reporting of capsid size  $R$  could give a larger error in packing density for small  $R$  as in the equation below:  $\rho_{\text{exact}} = \frac{L_g}{4/3\pi R^3(1+\Delta R/R)^3} \approx \frac{L_g}{4/3\pi R^3}(1 - 3\Delta R/R) = \rho_{\text{calculated}}(1 - 3\Delta R/R)$ . As can be seen from this simple calculation, the error in capsid measurement  $\Delta R$  has more severe implications on density measurement for smaller  $R$ .

**Table S2. Power law fit,  $y = ax^m$ , for capsid volume ( $y$ ) and genome length ( $x$ ) for group of viruses classified according to classification based on**

**(I) Baltimore classification**

**(II) Enveloped and non-enveloped**

**(III) Icosahedral and non-icosahedral viruses.**

**Related to Figure1 and STAR Methods “Data analysis”.**

Allometric exponents  $m$  and the associated statistical parameters ( $R^2$  and  $p$ ) for linear regression of the form  $Y = mX + A$ , where  $Y = \log y$  and  $X = \log x$ , and  $A = \log a$  to the data for different hosts. All logs are to the base 10.

| Classification                          | No of viruses | $m$  | $A$  | $R^2$ | p-value                 |
|-----------------------------------------|---------------|------|------|-------|-------------------------|
| Baltimore classification                |               |      |      |       |                         |
| dsDNA                                   | 197           | 1.29 | 3.23 | 0.66  | $< 2.2 \times 10^{-16}$ |
| ssDNA                                   | 30            | 1.05 | 3.35 | 0.43  | $5.033 \times 10^{-05}$ |
| dsRNA                                   | 26            | 0.87 | 3.97 | 0.39  | 0.0004                  |
| ssRNA (+)                               | 88            | 1.75 | 2.96 | 0.42  | $7.236 \times 10^{-12}$ |
| ssRNA (-)                               | 26            | 3.82 | 1.62 | 0.56  | $6.561 \times 10^{-06}$ |
| Reverse transcribing                    | 14            | 1.67 | 3.73 | 0.38  | 0.01122                 |
| Enveloped and non-enveloped viruses     |               |      |      |       |                         |
| Enveloped                               | 113           | 0.99 | 4.40 | 0.63  | $< 2.2 \times 10^{-16}$ |
| Non-enveloped                           | 268           | 1.05 | 3.53 | 0.76  | $< 2.2 \times 10^{-16}$ |
| Icosahedral and non-icosahedral viruses |               |      |      |       |                         |
| Icosahedral                             | 291           | 1.14 | 3.55 | 0.69  | $< 2.2 \times 10^{-16}$ |
| Non-icosahedral                         | 90            | 1.09 | 3.99 | 0.64  | $< 2.2 \times 10^{-16}$ |
